# Supplementary figures and images for: Rangewide adaptive plasticity in trees provides resilience to climate change
Source: Research Square preprint supplement (doi:10.21203/rs.3.rs-7611542/v1), 2025-09-22

**A)**

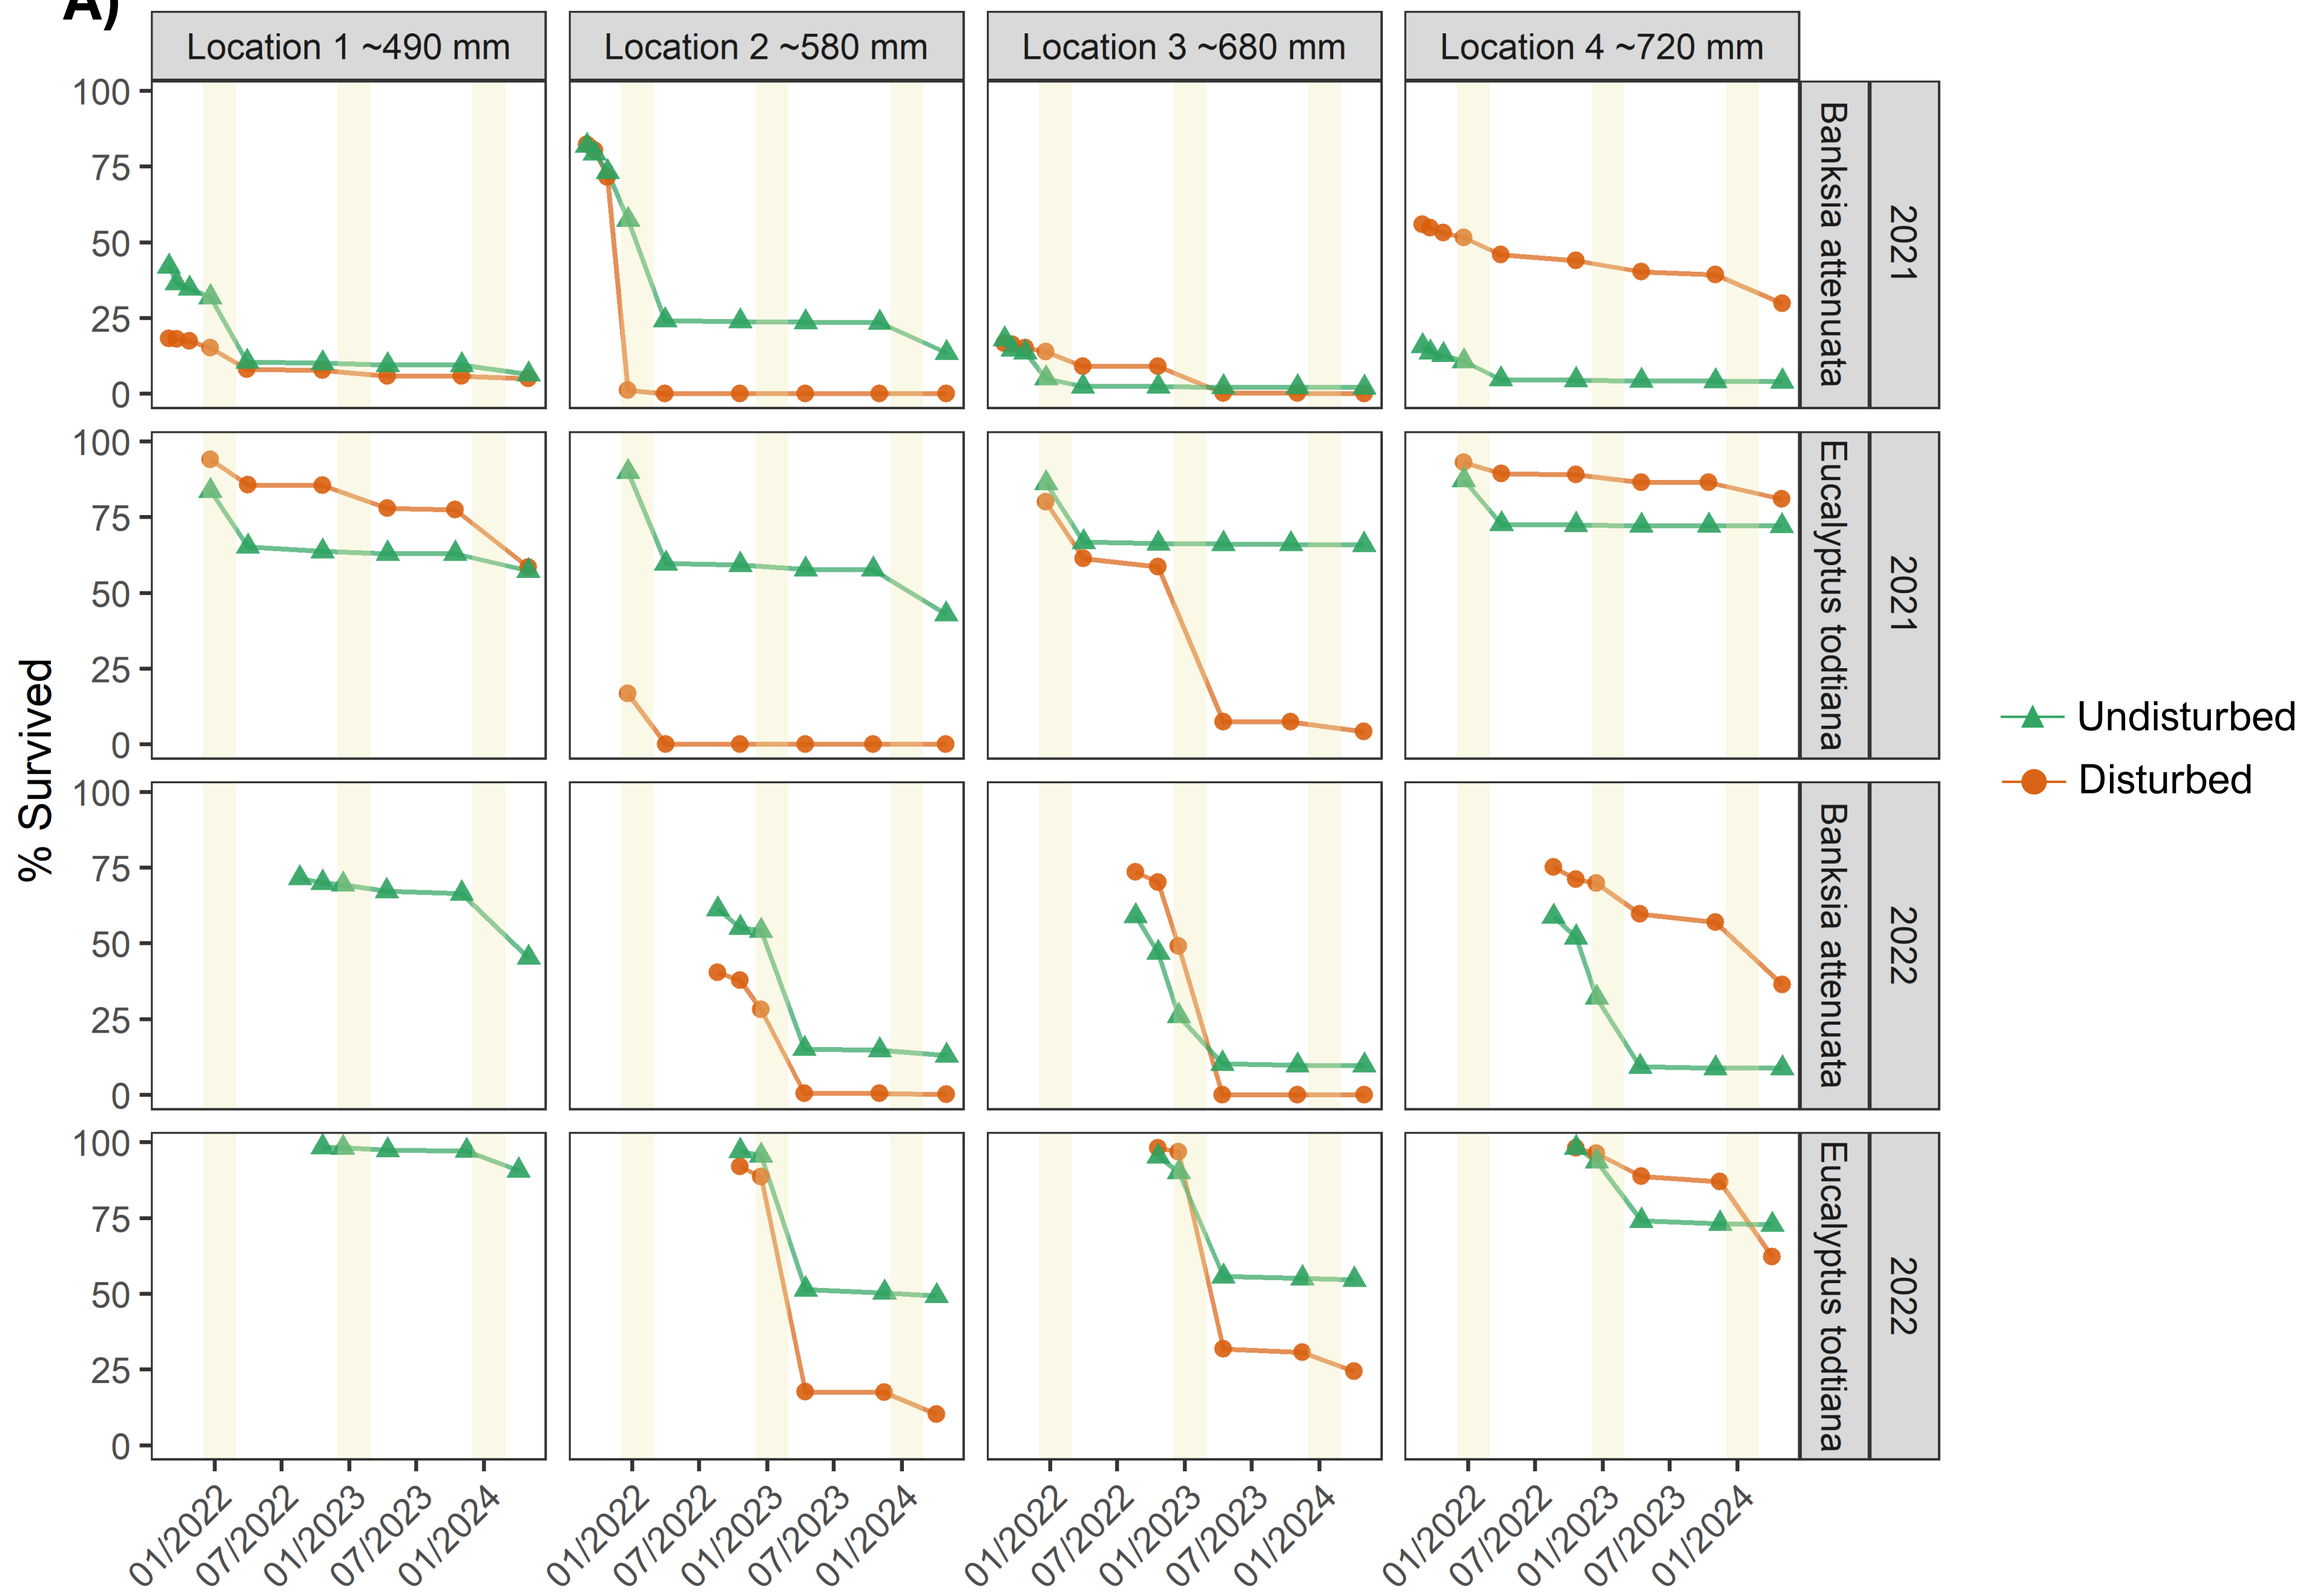

**B)**

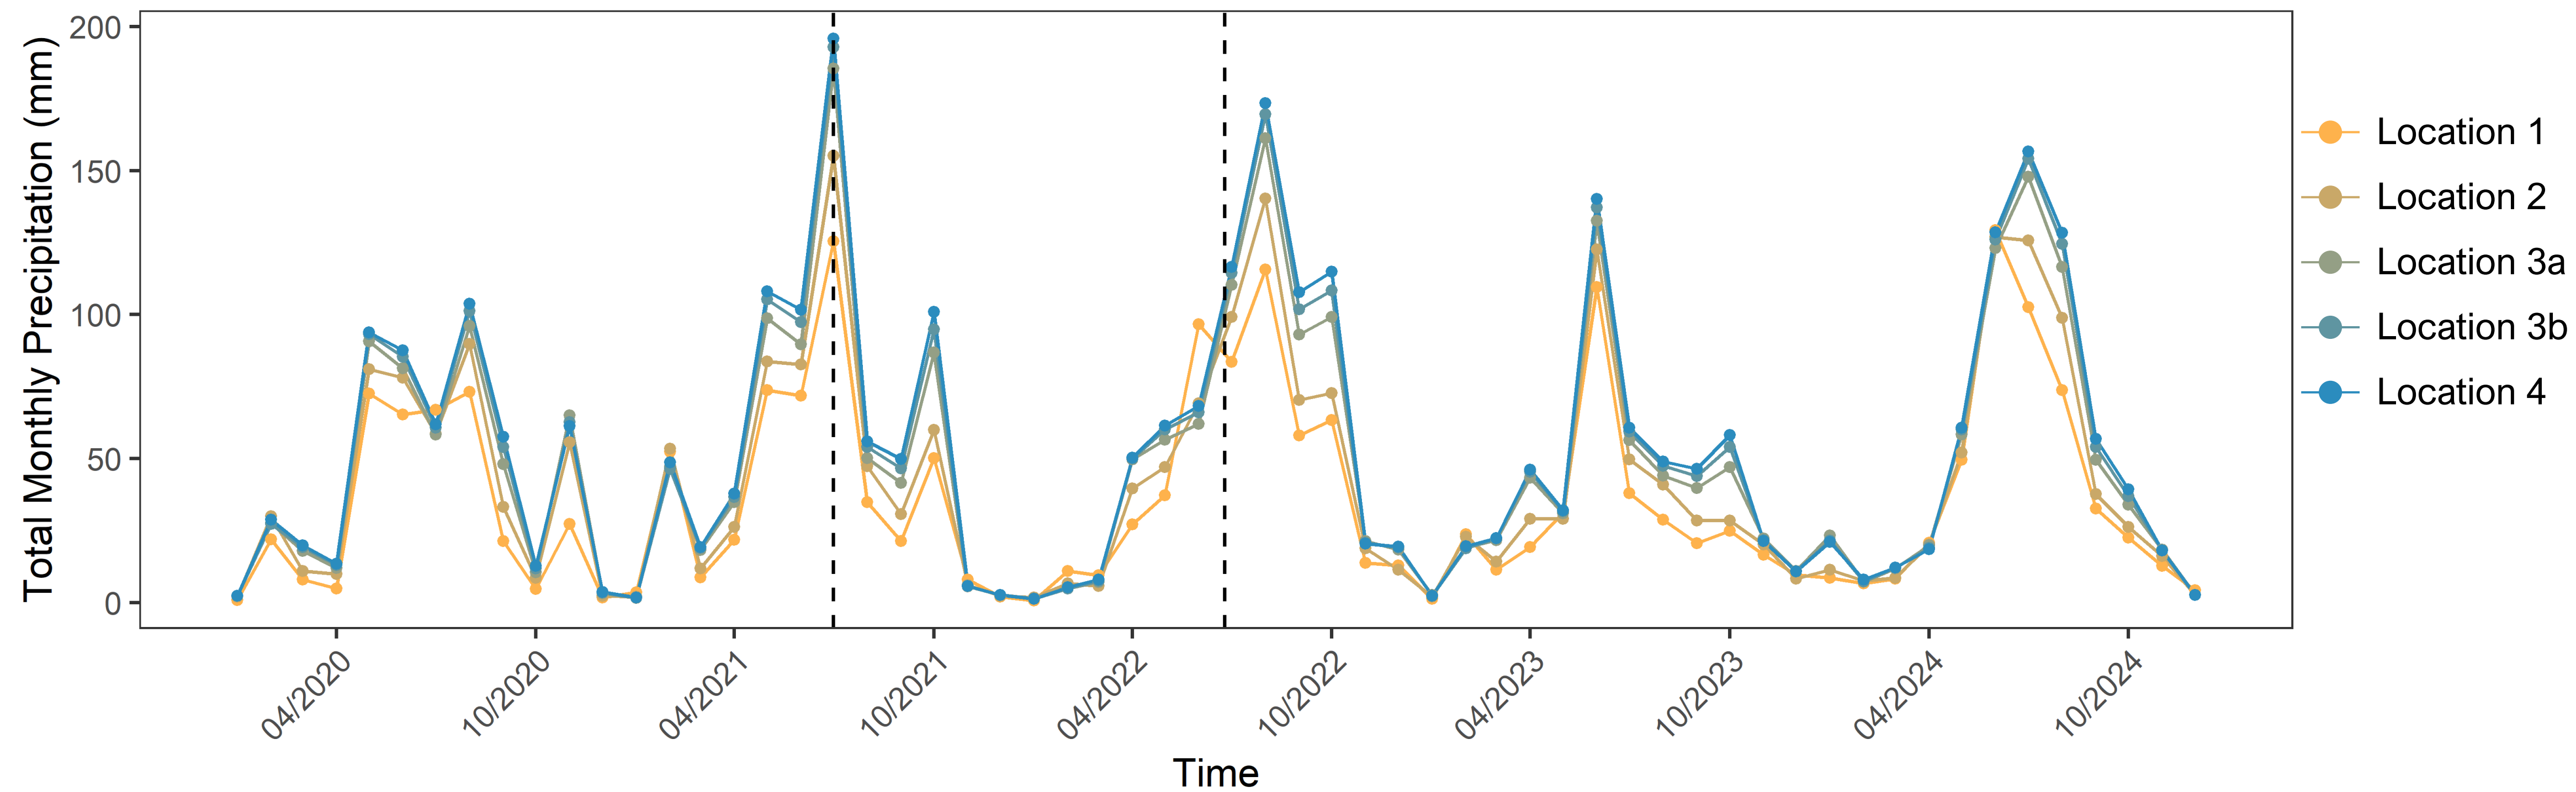

Supplement: Supplementary file 2 [file f0e21de77b1818ac267c53cb.pdf]
